# Supplementary material
Source: PubMed Central journal article supplement (PMC2898418)

## Supplemental Data

### METHODS

**Subcellular fractionation.** LAK cells were homogenized by 10 strokes of a Dounce homogenizer in 5 ml of a solution consisting of 0.25 M sucrose, 0.5 mM EDTA, 10 mM HEPES, pH 7.4 and 1 mM PMSF (homogenate buffer). The homogenate was then centrifuged at 1000 x g for 10 min at 4 °C and the supernatant was loaded on the top of a continuous 0.4-1.6 M sucrose gradient containing 1 mM EDTA, 10 mM HEPES, pH 7.4. After centrifugation at 100,000 x g for 20 h in a SW40Ti rotor (Beckman), 11 fractions were collected from the bottom of the tube. For Western blot analysis, an equal volume of 40 µl of each fraction were separated on either 10% or 13% SDS-PAGE and transferred to nitrocellulose membrane. The membrane was blocked in blocking buffer (10 mM Tris-HCl, pH 7.6, 150 mM NaCl, 0.05% Tween 20) containing 5% nonfat dry milk for 2 h at room temperature and then incubated with anti-NaK-ATPase (1:500; NOVUS Biologicals), anti-Hsp60 (1:2000; Stressgen), anti-Calreticulin (1:2000; Santa Cruz Biotechnology), anti-LAMP-1 (1:1000; BD Biosciences), anti-Rap1 (1:2000; Santa Cruz Biotechnology), or anti-CD38 (1:2000; Santa Cruz Biotechnology) antibodies in the blocking buffer overnight at 4 °C. Blots were then washed with blocking buffer and incubated with HRP-conjugated anti-rabbit, anti-rat, anti-mouse, or anti-goat antibodies (1:2000; Santa Cruz Biotechnology) in the blocking buffer at room temperature for 1 h. The immunoreactive proteins with respective secondary Abs were determined using an enhanced chemiluminescence kit (Amersham Pharmacia Biotech) and exposed to an LAS 1000 Image Reader Lite (Fujifilm, Japan).

**Expression and Construction of Green Fluorescent Protein (GFP)-fused CD38.** The expression construct encoding CD38-enhanced green fluorescent fusion protein was constructed by the following. The coding sequence of CD38 was PCR-amplified from CD38 (CD38 cDNA in pFLAG-CMV2 vector) using the sense primer, 5'-CCCAAGCCTATGGCTAACTATGAATTTAGCCA-3' (the *Hind*III site is underlined, the start codon of CD38 is bolded), and the antisense primer, 5'-ACGCGTCGACCACGTATTAAGTCTACACGATGG -3' (the *Sal*I site is underlined). The PCR products were eluted from agarose using Gel & PCR Purification System (SolGent, Korea) and subcloned using the T&A cloning kit (RBC). Then, after restriction digestion with *Hind*III and *Sal*I, the PCR product was ligated with identically predigested pEGFP-N1 vector (CLONTECH) to create pEGFP-CD38. LAK cells were transfected with GFP-CD38 using transfection reagent (Invitrogen).

## Supplementary Figures and Legends

**Figure S1. Time course of cADPR and NAADP transport into LAK cells.** Transport experiments were executed by a rapid oil-stop procedure as described under “Experimental Procedures.” and cADPR and NAADP transported were measured using a cyclic enzymatic assay described in the manuscript. LAK cells were treated 200  $\mu\text{M}$  cADPR (A) and 100  $\mu\text{M}$  NAADP (B) at 37  $^{\circ}\text{C}$ . The means  $\pm$  S.E. of three independent experiments are shown.

**Figure S2. Dipyridamole blocks on cADPR- and NAADP-induced  $\text{Ca}^{2+}$  and cell migration.** A, B, NAADP-induced  $\text{Ca}^{2+}$  increase prevented by dipyridamole, an inhibitor of equilibrative nucleoside transporters, in CD38<sup>+/+</sup> (A) and CD38<sup>-/-</sup> (B) LAK cells. LAK cells were preincubated with 100  $\mu\text{M}$  dipyridamole for 15 min before the treatment with 50 nM NAADP. Arrows indicate the time points of the addition of NAADP. *n* indicates the number of cells examined for  $\text{Ca}^{2+}$  measurement. C, D, cADPR- or NAADP-induced cell migration was inhibited by dipyridamole in CD38<sup>+/+</sup> (C) and CD38<sup>-/-</sup> (D) LAK cells. The means  $\pm$  S.E. of three independent experiments are shown. \*  $p < 0.01$ , control versus cADPR or NAADP; \*\*  $p < 0.05$ , cADPR versus cADPR plus dipyridamole ; #  $p < 0.01$ , NAADP versus NAADP plus dipyridamole.

**Figure S3. Effects of ACA on IL8-induced formation of cADPR and NAADP,  $\text{Ca}^{2+}$  increase, and cell migration.** A, B, ACA, a specific inhibitor of TRPM2, did not inhibit IL8-stimulated increase of [cADPR]<sub>i</sub> and [NAADP]<sub>i</sub>. Levels of cADPR and NAADP were determined after treatment of LAK cells with 10 pM IL8. LAK cells were preincubated with 20  $\mu\text{M}$  ACA for 20 min before incubation with IL8. The means  $\pm$  S.E. of three independent experiments are shown. \*  $p < 0.05$ , control versus IL8 or IL8 plus ACA. C, IL8-stimulated increase in [ $\text{Ca}^{2+}$ ]<sub>i</sub> with (open circle) and without (closed circle) ACA. Arrows indicate the time points of the addition of IL8. *n* indicates the number of cells examined for  $\text{Ca}^{2+}$  measurement. D, ACA inhibited IL8-induced cell migration. The means  $\pm$  S.E. of three independent experiments are shown. \*  $p < 0.01$ , control versus IL8; \*\*  $p < 0.05$ , IL8 versus IL8 plus ACA.

**Figure S4. CD38 is localized in lysosomes as well as plasma membrane.** LAK cells were transfected with GFP-CD38 using lipofectamine. After 72 h, LAK cells were serum-starved with serum free RPMI1640 for 18 h. LAK cells were loaded with LysoTracker Red DND-99 (75 nM) for 1 h at 37  $^{\circ}\text{C}$  to label lysosomes, treated with 10 pM IL8 for 90 s, and then fixed

with 3.7% paraformaldehyde. Images were taken using Zeiss confocal microscope equipped with a Plan-Apochromat X63 objective.

**Figure S5. IL8 induced internalization of CD38 to early endosomes, but do not translocation of CD38 to lysosomes.** LAK cells were treated with buffer (A) or 10 pM IL8 (B) for 90 s, homogenized, and a postnuclear supernatant was fractionated on a sucrose density gradient (0.4-1.6 M). Fractions were analyzed by Western blot to identify cellular organelles and identified by using antibodies against each markers, plasma membrane (NaK-ATPase), early endosomes (EEA1), and lysosomes (LAMP-1). The location of CD38 in fractions was identified with both Western blotting and measuring ADP-ribosyl cyclase activity. The means  $\pm$  S.E. of three independent experiments are shown. \*  $p < 0.05$ , control *versus* IL8.

**Figure S6. Localization of Rap1 in lysosome-containing fractions from LAK cells.** LAK cells were homogenized, and a postnuclear supernatant was fractionated on a sucrose density gradient (0.4-1.6 M). Fractions were analyzed by Western blot to identify cellular organelles and identified by using antibodies against each markers, plasma membrane (NaK-ATPase), mitochondria (Hsp60), endoplasmic reticulum (Calreticulin), and lysosomes (LAMP-1). Locations of Rap1 and CD38 were analyzed by western blotting.

**Figure S1**

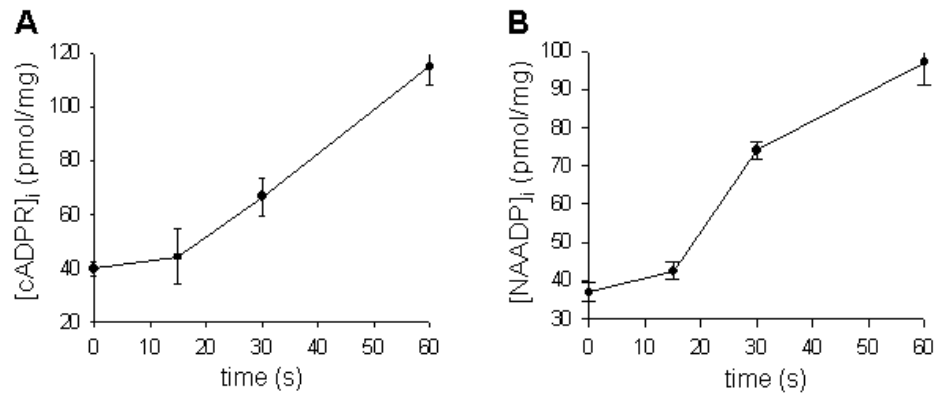

**Figure S2**

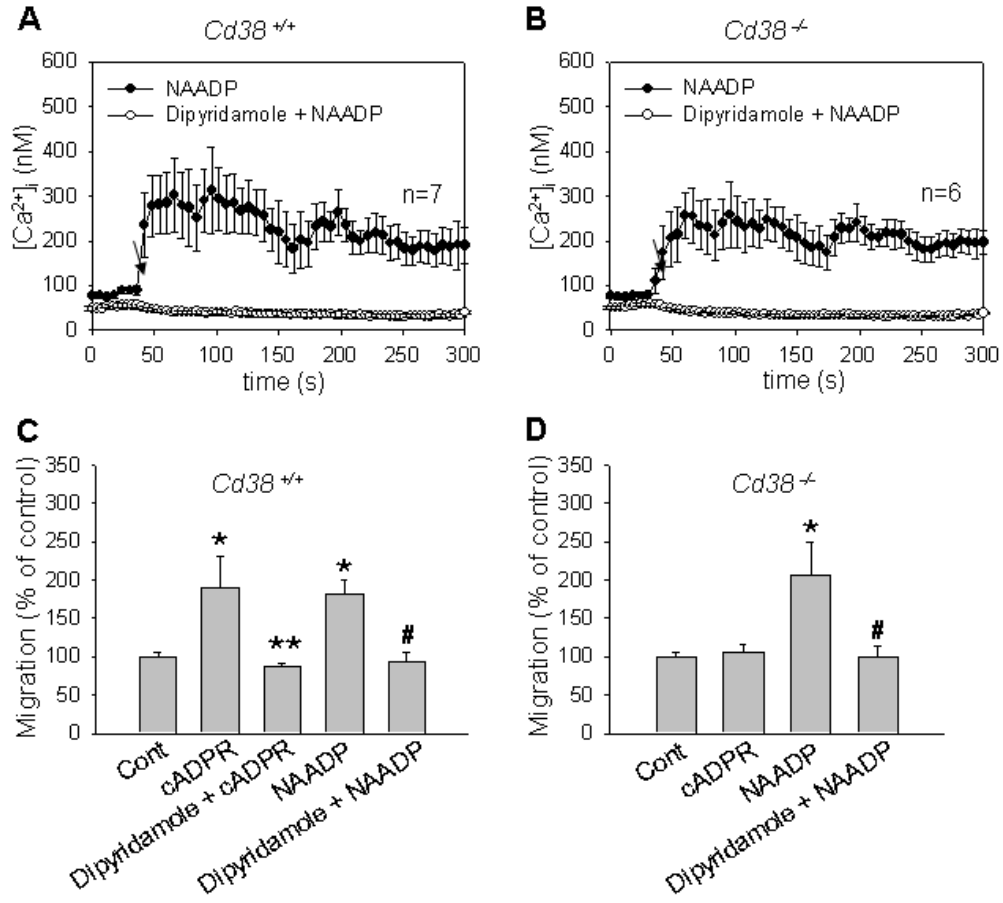

**Figure S3**

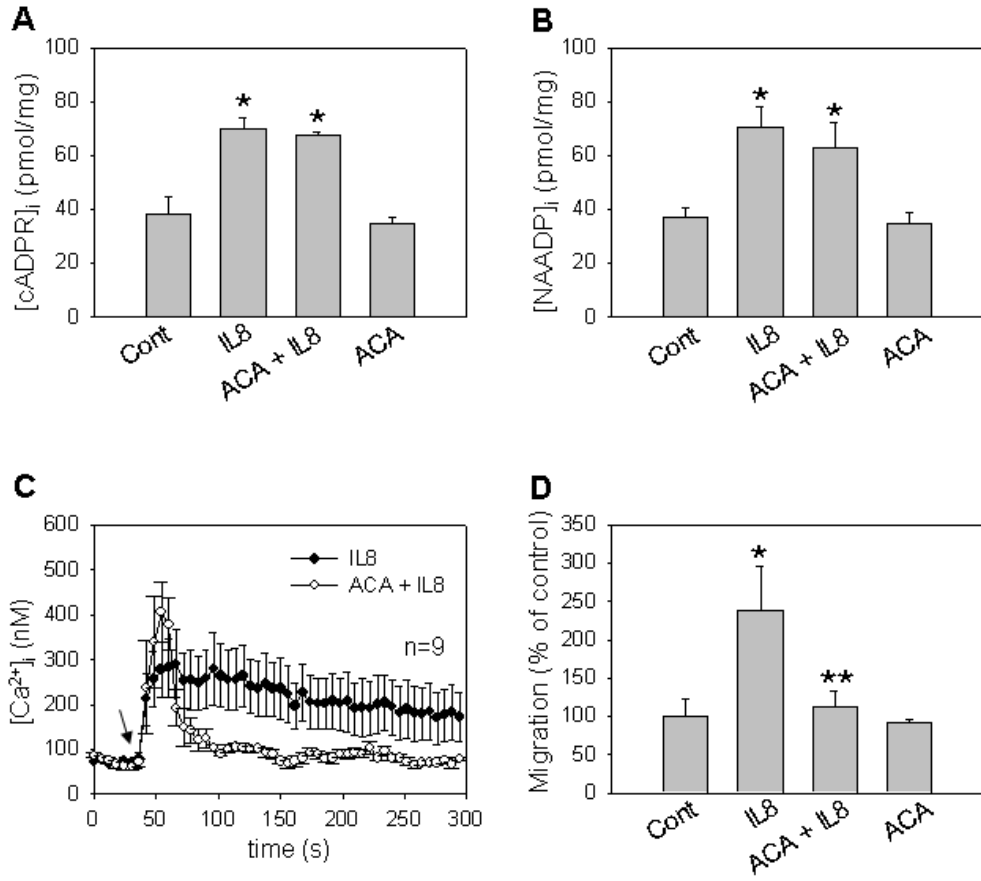

**Figure S4**

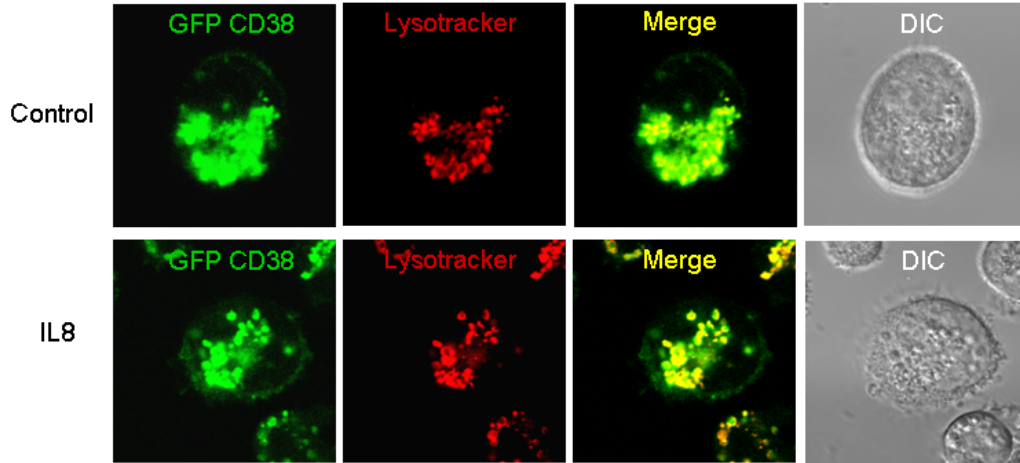

**Figure S5**

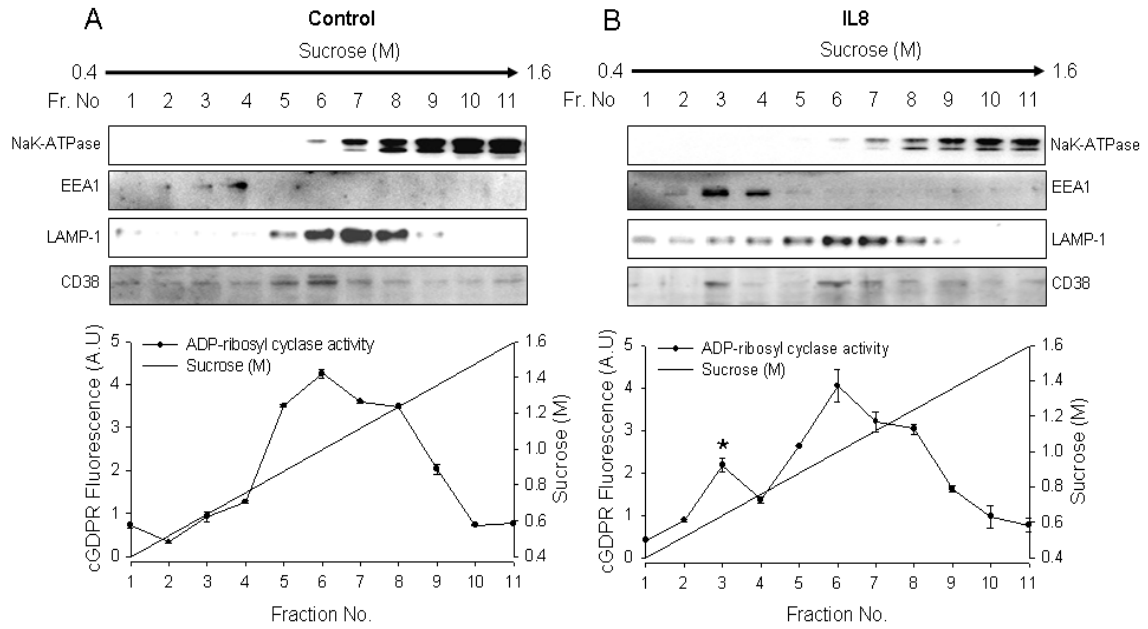



**Figure S6**

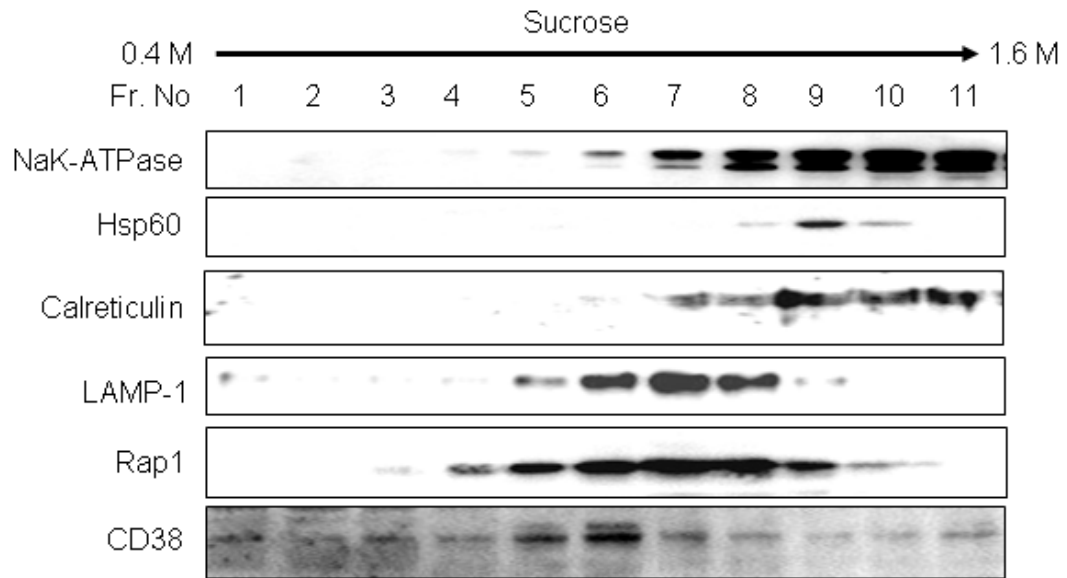

Supplement: supp_M109.066290_jbc.M109.066290-1.pdf [file supp_M109.066290_jbc.M109.066290-1.pdf]
